# Supplementary material for: Integrative Metabolomic and Proteomic Signatures Define Clinical Outcomes in Severe COVID-19
Source: bioRxiv or medRxiv preprint supplement (doi:10.1101/2021.07.19.21260776), 2022-02-11

## Supplementary Figure 1 – Time effects across first three days of hospitalization

For each metabolite and transcript, the same linear mixed effect model as for the COVID-19. vs normal analysis was computed:  $x \sim \text{Time} + \text{Status} + (1 | \text{Patient\_ID})$ . In this case we evaluated the significance the “Time” term to evaluate the effects of the day of sample taking.

### Metabolomics

A total of 35 out of 125 metabolites showed a significant time effect.

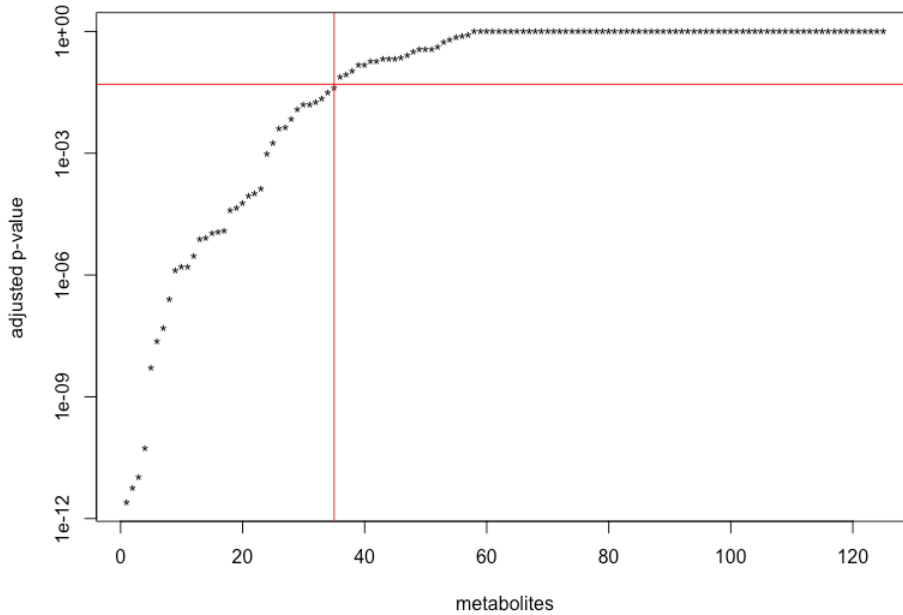

### Examples, top 4 associations

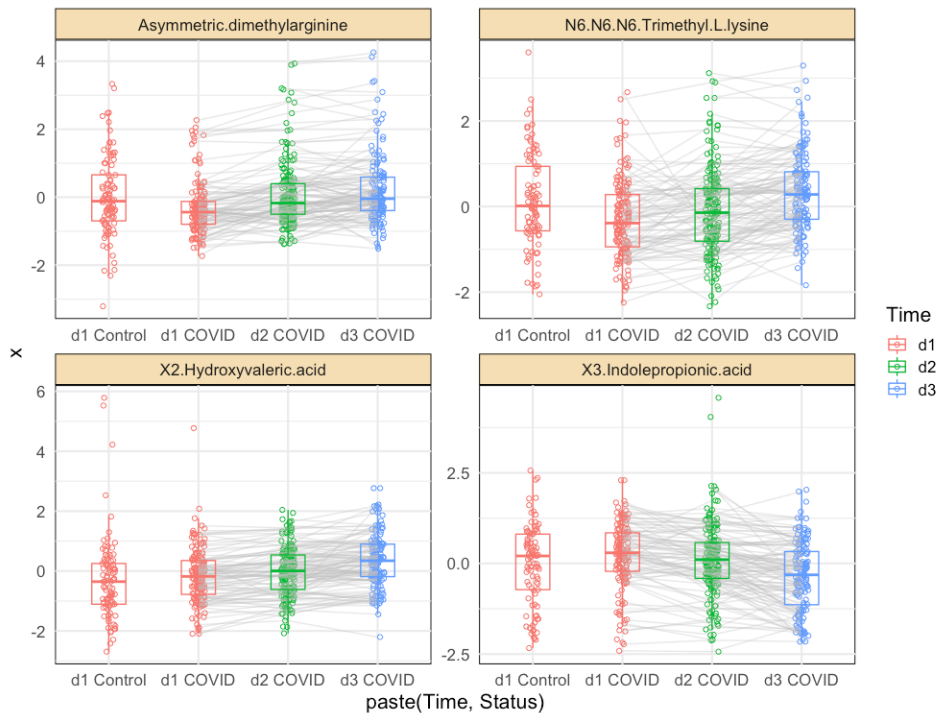

# Proteomics

A total of 25 out of 266 proteins showed a significant time effect.

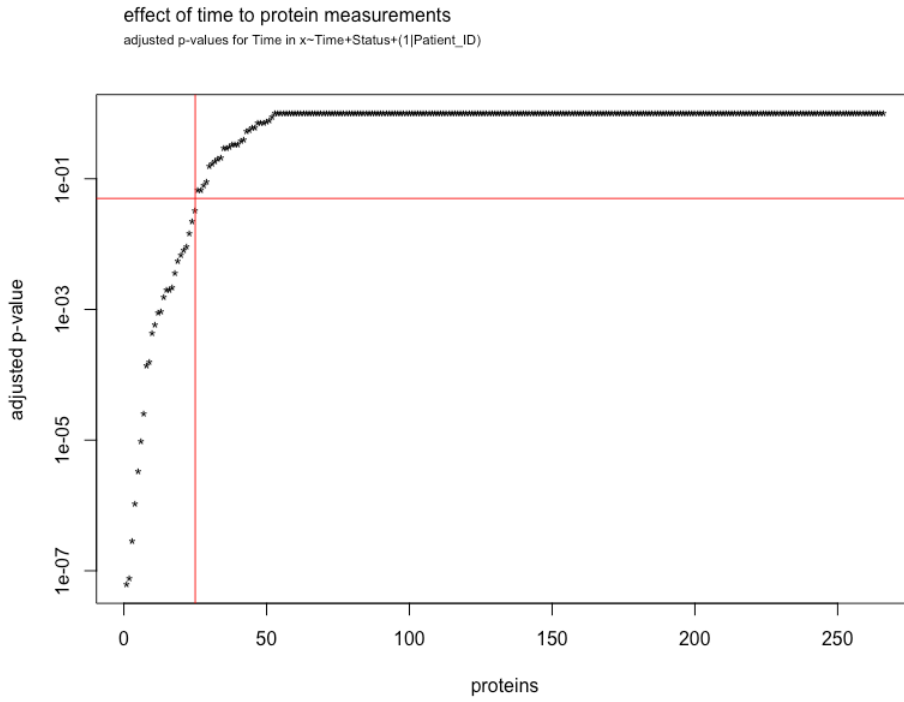

## Examples, top 4 associations

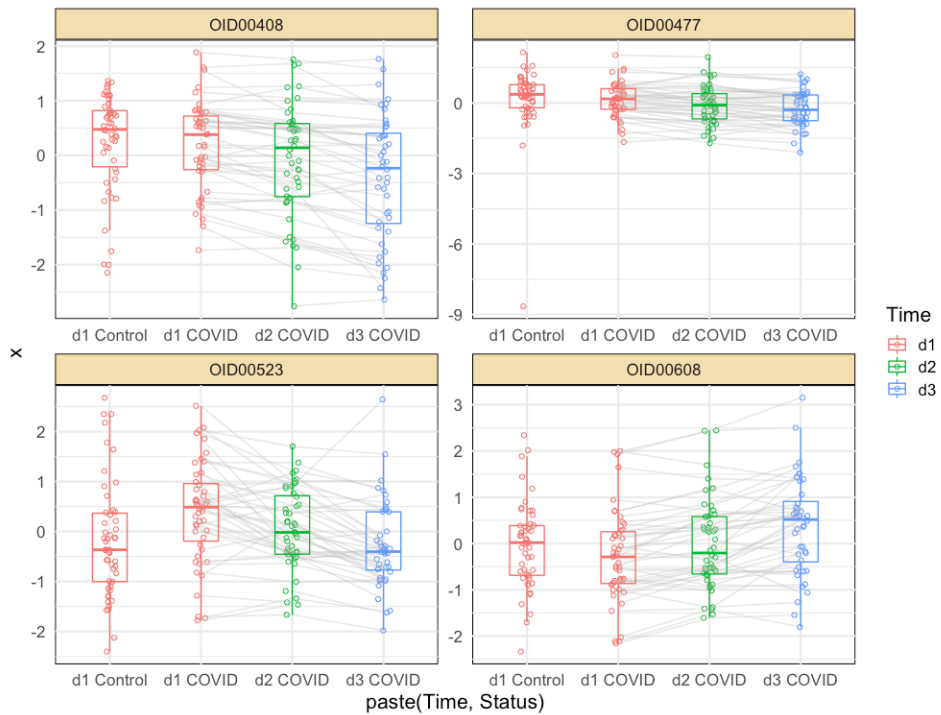

Supplement: Supplementary file [file media-1.pdf]
