# Supplementary material for: Integrative Metabolomic and Proteomic Signatures Define Clinical Outcomes in Severe COVID-19
Source: bioRxiv or medRxiv preprint supplement (doi:10.1101/2021.07.19.21260776), 2022-02-11

## Supplementary Figure 2 – Sample-wise principal component analysis (PCA)

### Metabolomics

Colored by status

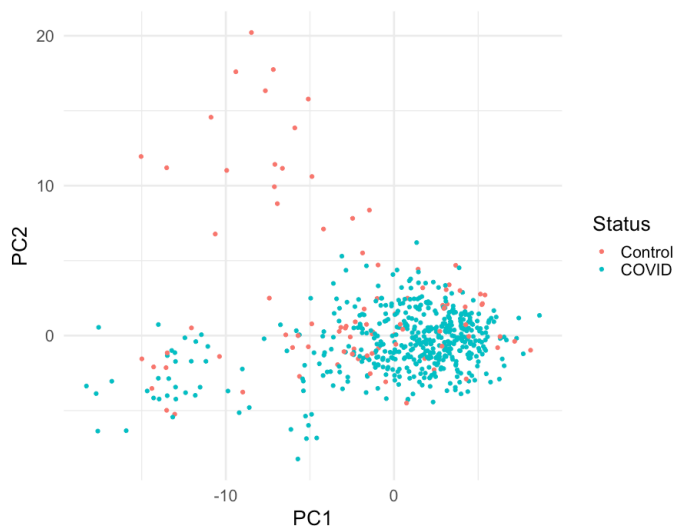

Colored by batch

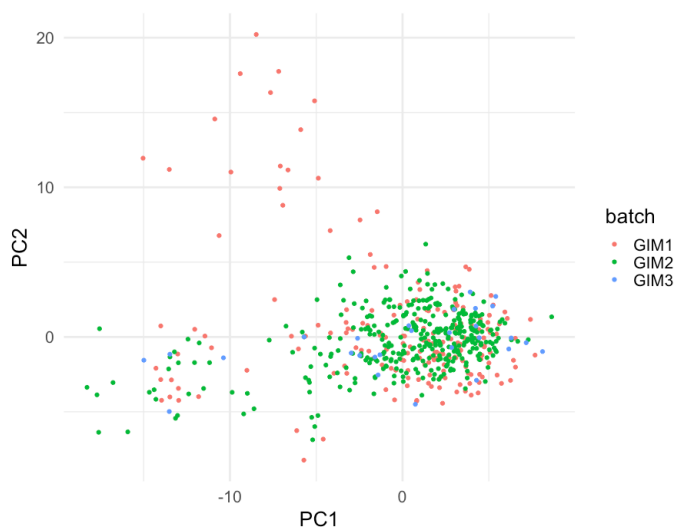

### Proteomics

Colored by status

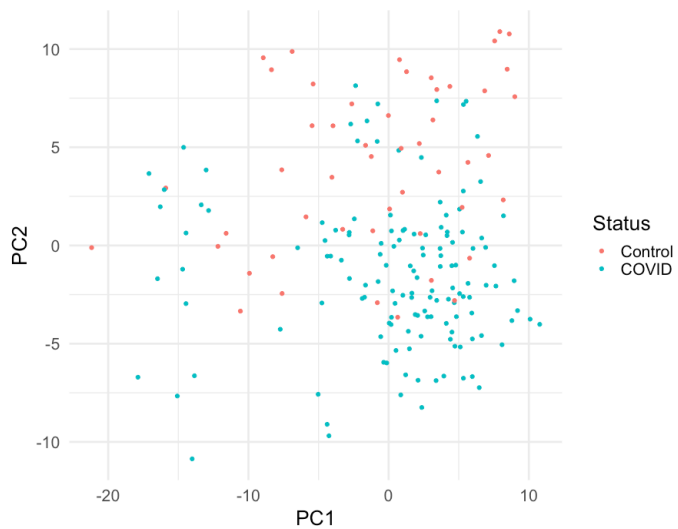

Colored by batch

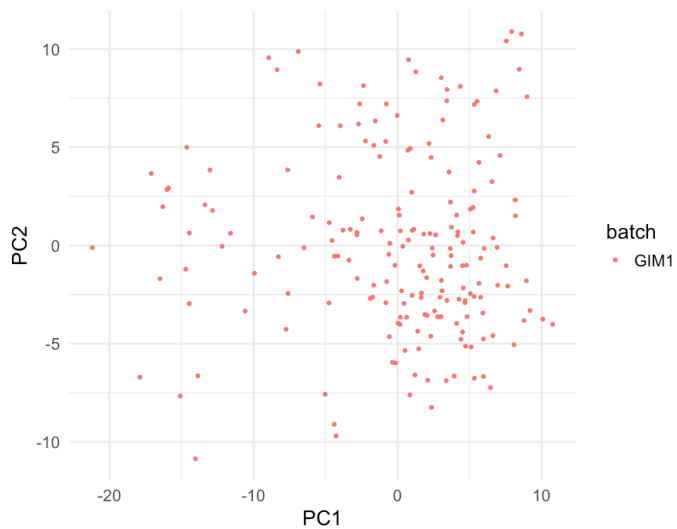

Supplement: Supplementary file [file media-2.pdf]
