# Supplementary material for: Integrative Metabolomic and Proteomic Signatures Define Clinical Outcomes in Severe COVID-19
Source: bioRxiv or medRxiv preprint supplement (doi:10.1101/2021.07.19.21260776), 2022-02-11
Supplement: Supplementary file [file media-4.pdf]

## Supplementary Figure 4 – Tradeoff between metabolites included in model's performance

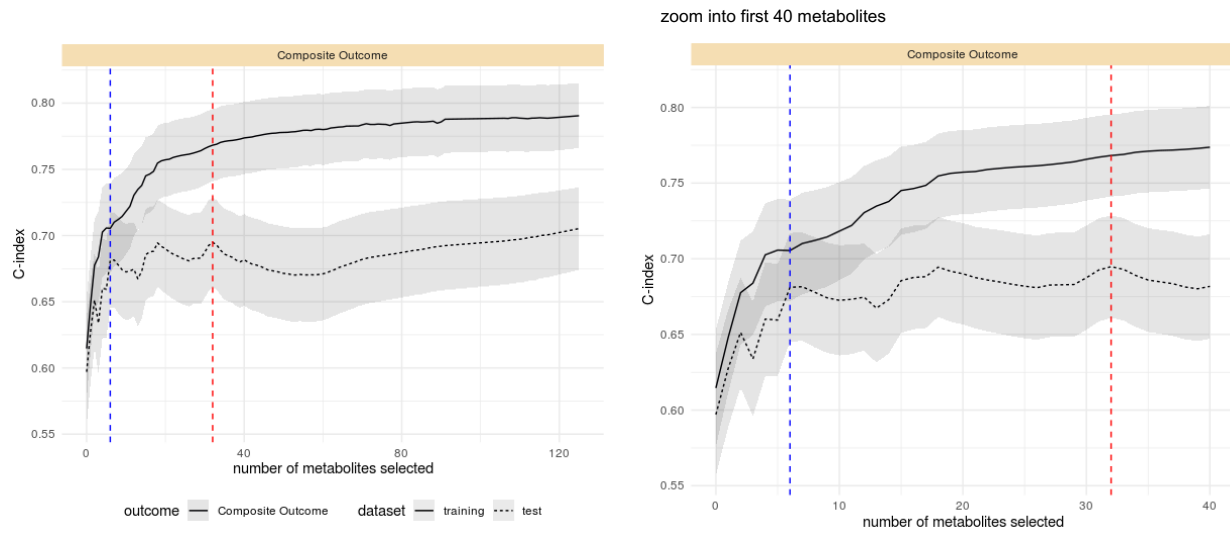

This figure shows the tradeoff between the selected number of metabolites and model performance. The optimal model had 33 metabolites (red line), while a sparser solution with similar performance can be achieved with 6 metabolites only (blue line).
