# Supplementary material for: Integrative Metabolomic and Proteomic Signatures Define Clinical Outcomes in Severe COVID-19
Source: bioRxiv or medRxiv preprint supplement (doi:10.1101/2021.07.19.21260776), 2022-02-11

## Supplementary Figure 5 – Assessment of reproducibility of the LC-MS metabolomics data.

**A:** Coefficient of variation for quantitation calculated based on the quality control sample which was injected thirteen times throughout the serum sample runs. The median CV was 0.061. **B:** Overlaid LC retention time shift distributions of all the serum samples. For each sample, a density plot was generated using the retention time shifts of detected metabolites. **C+D:** Overlaid mass error distributions of all the serum samples. For each sample, a density plot was generated using the mass errors of detected metabolites. The plot was generated separately for positive and negative ion modes.

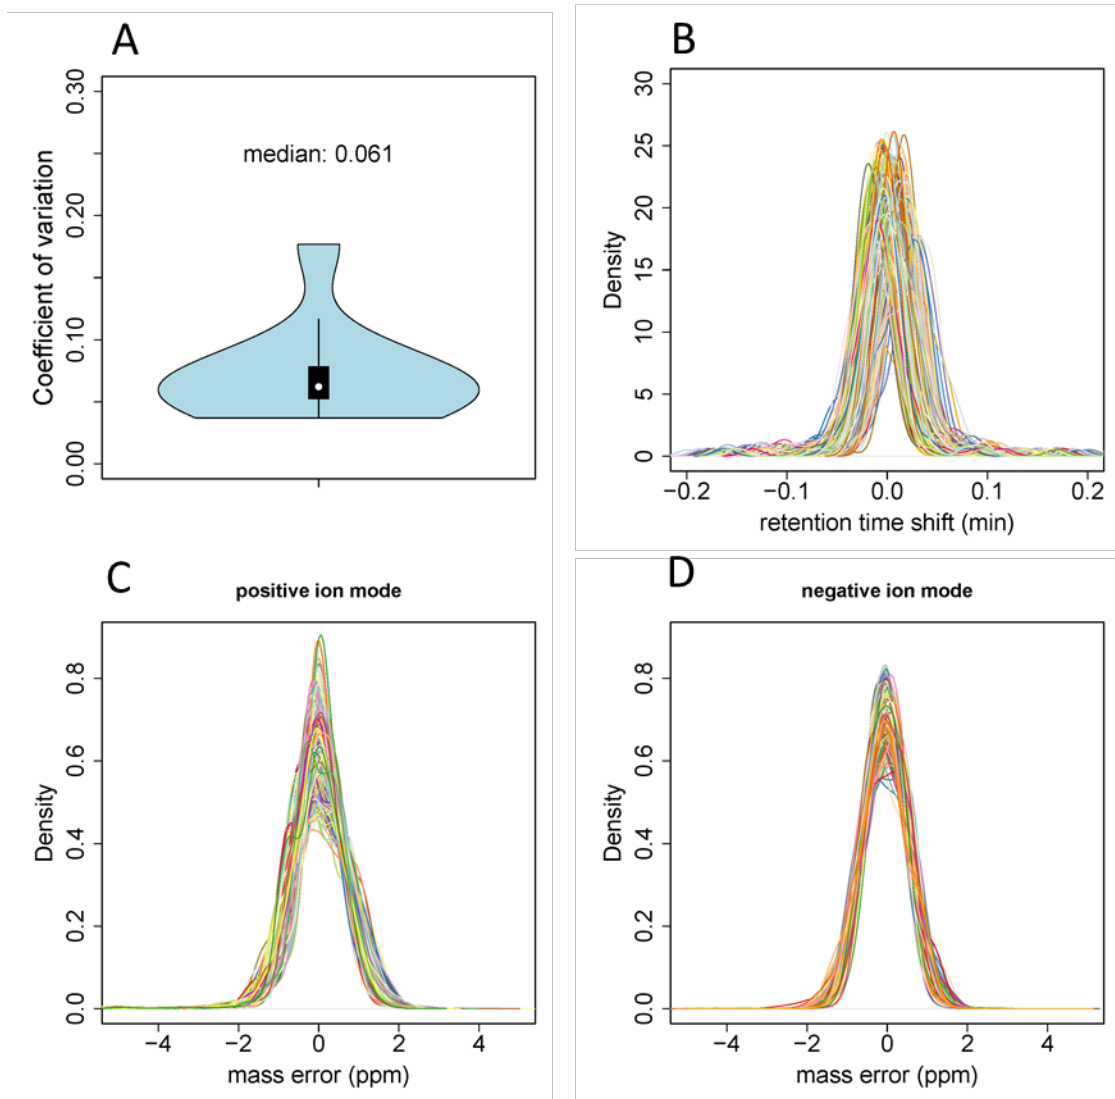

Supplement: Supplementary file [file media-5.pdf]
