# Supplementary material for: Integrative Metabolomic and Proteomic Signatures Define Clinical Outcomes in Severe COVID-19
Source: bioRxiv or medRxiv preprint supplement (doi:10.1101/2021.07.19.21260776), 2022-02-11
Supplement: Supplementary file [file media-6.pdf]

| <b>Supplementary Table 1: Additional clinical characteristics of the cohort</b> |                                     |                                      |                            |
|---------------------------------------------------------------------------------|-------------------------------------|--------------------------------------|----------------------------|
| <b>Characteristic</b>                                                           | <b>Negative, N = 97<sup>1</sup></b> | <b>COVID-19, N = 330<sup>1</sup></b> | <b>p-value<sup>2</sup></b> |
| <b>Laboratories</b>                                                             |                                     |                                      |                            |
| White blood cell                                                                | 7.6 (4.9, 11.6)                     | 6.3 (4.6, 8.6)                       | <b>0.015</b>               |
| Neutrophils                                                                     | 4.9 (2.9, 9.0)                      | 4.8 (3.2, 7.0)                       | 0.8                        |
| Hemoglobin                                                                      | 10.80 (9.00, 13.00)                 | 13.00 (11.80, 14.20)                 | <b>&lt;0.001</b>           |
| Neutrophil/Lymphocytes                                                          | 5 (3, 9)                            | 6 (4, 10)                            | 0.2                        |
| Partial thromboplastin time                                                     | 30.2 (27.9, 33.8)                   | 31.8 (29.4, 34.1)                    | 0.11                       |
| Prothrombin time                                                                | 13.35 (11.85, 15.80)                | 13.45 (12.60, 14.47)                 | 0.5                        |
| Fibrinogen                                                                      | 434 (369, 454)                      | 461 (394, 628)                       | 0.4                        |
| Albumin                                                                         | 3.10 (2.50, 3.70)                   | 3.00 (2.60, 3.40)                    | 0.14                       |
| Total bilirubin                                                                 | 0.50 (0.30, 0.85)                   | 0.60 (0.40, 0.80)                    | 0.4                        |
| Lactate dehydrogenase                                                           | 328 (218, 480)                      | 408 (308, 521)                       | 0.092                      |
| Creatinine                                                                      | 1.01 (0.75, 1.38)                   | 0.94 (0.76, 1.23)                    | 0.5                        |
| Lactate                                                                         | 1.30 (1.00, 1.87)                   | 1.17 (0.88, 1.65)                    | 0.2                        |
| Glucose                                                                         | 111 (93, 144)                       | 111 (95, 146)                        | 0.6                        |
| Erythrocyte sedimentation rate                                                  | 46 (30, 60)                         | 63 (40, 86)                          | 0.1                        |
| PH                                                                              | 7.45 (7.45, 7.51)                   | 7.38 (7.32, 7.43)                    | <b>0.003</b>               |
| PaO <sub>2</sub>                                                                | 112 (86, 152)                       | 39 (25, 70)                          | <b>&lt;0.001</b>           |
| PaCO <sub>2</sub>                                                               | 36 (30, 42)                         | 40 (35, 46)                          | 0.2                        |
| <b>Clinical outcomes</b>                                                        |                                     |                                      |                            |
| Highest level of supplemental oxygen in the first 3 hours of admission          |                                     |                                      | <b>0.001</b>               |
| HFNC/NRB/NIV                                                                    | 6 (6.2%)                            | 38 (12%)                             |                            |
| Mechanical ventilation                                                          | 3 (3.1%)                            | 15 (4.5%)                            |                            |
| Nasal Cannula                                                                   | 16 (16%)                            | 107 (32%)                            |                            |
| None                                                                            | 72 (74%)                            | 170 (52%)                            |                            |
| CXR results at admission                                                        |                                     |                                      | <b>&lt;0.001</b>           |
| Bilateral infiltrates                                                           | 14 (14%)                            | 232 (70%)                            |                            |
| Clear                                                                           | 47 (48%)                            | 36 (11%)                             |                            |
| Not specified                                                                   | 6 (6.2%)                            | 0 (0%)                               |                            |
| Other                                                                           | 11 (11%)                            | 56 (17%)                             |                            |
| Pleural effusion                                                                | 0 (0%)                              | 6 (1.8%)                             |                            |
| Unilateral infiltrates                                                          | 19 (20%)                            | 0 (0%)                               |                            |
| ARDS diagnosis                                                                  | 0 (0%)                              | 111 (34%)                            | <b>&lt;0.001</b>           |
| Respiratory co-infection                                                        | 41 (42%)                            | 57 (17%)                             | <b>&lt;0.001</b>           |

<sup>1</sup> Statistics presented: median (IQR); n (%)

<sup>2</sup> Statistical tests performed: Wilcoxon rank-sum test; Fisher's exact test; Fisher's test with simulated p-value; chi-square test of independence
