# Supplementary material for: Integrative Metabolomic and Proteomic Signatures Define Clinical Outcomes in Severe COVID-19
Source: bioRxiv or medRxiv preprint supplement (doi:10.1101/2021.07.19.21260776), 2022-02-11
Supplement: Supplementary file [file media-7.pdf]

## Supplementary Table 2: Symptoms and admission diagnosis of controls

| Characteristic                            | Negative, N = 97 <sup>1</sup> |
|-------------------------------------------|-------------------------------|
| <b>Main symptom</b>                       |                               |
| Shortness of breath                       | 30 (31%)                      |
| Fever                                     | 28 (29%)                      |
| Cough                                     | 15 (15%)                      |
| Chest pain                                | 4 (4.1%)                      |
| Abdominal pain                            | 3 (3.1%)                      |
| Altered mental status                     | 3 (3.1%)                      |
| Dizziness                                 | 3 (3.1%)                      |
| Arthralgia                                | 1 (1.0%)                      |
| Asymptomatic                              | 1 (1.0%)                      |
| Burn                                      | 1 (1.0%)                      |
| Fall                                      | 1 (1.0%)                      |
| Fatigue                                   | 1 (1.0%)                      |
| Leg pain                                  | 1 (1.0%)                      |
| Myalgias                                  | 1 (1.0%)                      |
| Rhinorrhea                                | 1 (1.0%)                      |
| Seizure                                   | 1 (1.0%)                      |
| Syncope                                   | 1 (1.0%)                      |
| Tachycardia                               | 1 (1.0%)                      |
| <b>Diagnosis</b>                          |                               |
| Pneumonia                                 | 27 (28%)                      |
| Acute coronary syndrome                   | 5 (5.2%)                      |
| Bacteremia                                | 5 (5.2%)                      |
| Heart failure exacerbation                | 5 (5.2%)                      |
| Urinary tract infection                   | 4 (4.1%)                      |
| Asthma                                    | 3 (3.1%)                      |
| Leukemia/Lymphoma                         | 3 (3.1%)                      |
| Upper respiratory infection               | 3 (3.1%)                      |
| Multiple myeloma/Myelodysplastic syndrome | 2 (2.1%)                      |
| Neutropenic fever                         | 2 (2.1%)                      |
| Pulmonary edema                           | 2 (2.1%)                      |
| Pulmonary embolism                        | 2 (2.1%)                      |
| Serositis                                 | 2 (2.1%)                      |
| Viral gastroenteritis                     | 2 (2.1%)                      |
| Abnormal vaginal bleeding                 | 1 (1.0%)                      |
| Acute cocaine intoxication                | 1 (1.0%)                      |
| Acute limb ischemia                       | 1 (1.0%)                      |
| Acute psychotic episode                   | 1 (1.0%)                      |
| Alcohol withdrawal                        | 1 (1.0%)                      |
| Anxiety                                   | 1 (1.0%)                      |
| Aortic aneurysm                           | 1 (1.0%)                      |
| Atrioventricular block                    | 1 (1.0%)                      |
| Bowel obstruction                         | 1 (1.0%)                      |
| Burn                                      | 1 (1.0%)                      |
| Cellulitis                                | 1 (1.0%)                      |
| Cholecystitis                             | 1 (1.0%)                      |
| COPD exacerbation                         | 1 (1.0%)                      |
| Deep venous thrombosis                    | 1 (1.0%)                      |
| Dehydration                               | 1 (1.0%)                      |
| Diabetic ketoacidosis                     | 1 (1.0%)                      |
| Failure to thrive                         | 1 (1.0%)                      |
| Fever of unknown origin                   | 1 (1.0%)                      |
| Fracture                                  | 1 (1.0%)                      |
| Guillain-Barré syndrome                   | 1 (1.0%)                      |
| Intracranial hemorrhage                   | 1 (1.0%)                      |
| 1n (%)                                    |                               |
